# Supplementary material
Source: PubMed Central journal article supplement (PMC9837434)
Supplement: BLOOD_BLD-2022-017616-mmc1.pdf [file BLOOD_BLD-2022-017616-mmc1.pdf]

Supplementary Figure 1

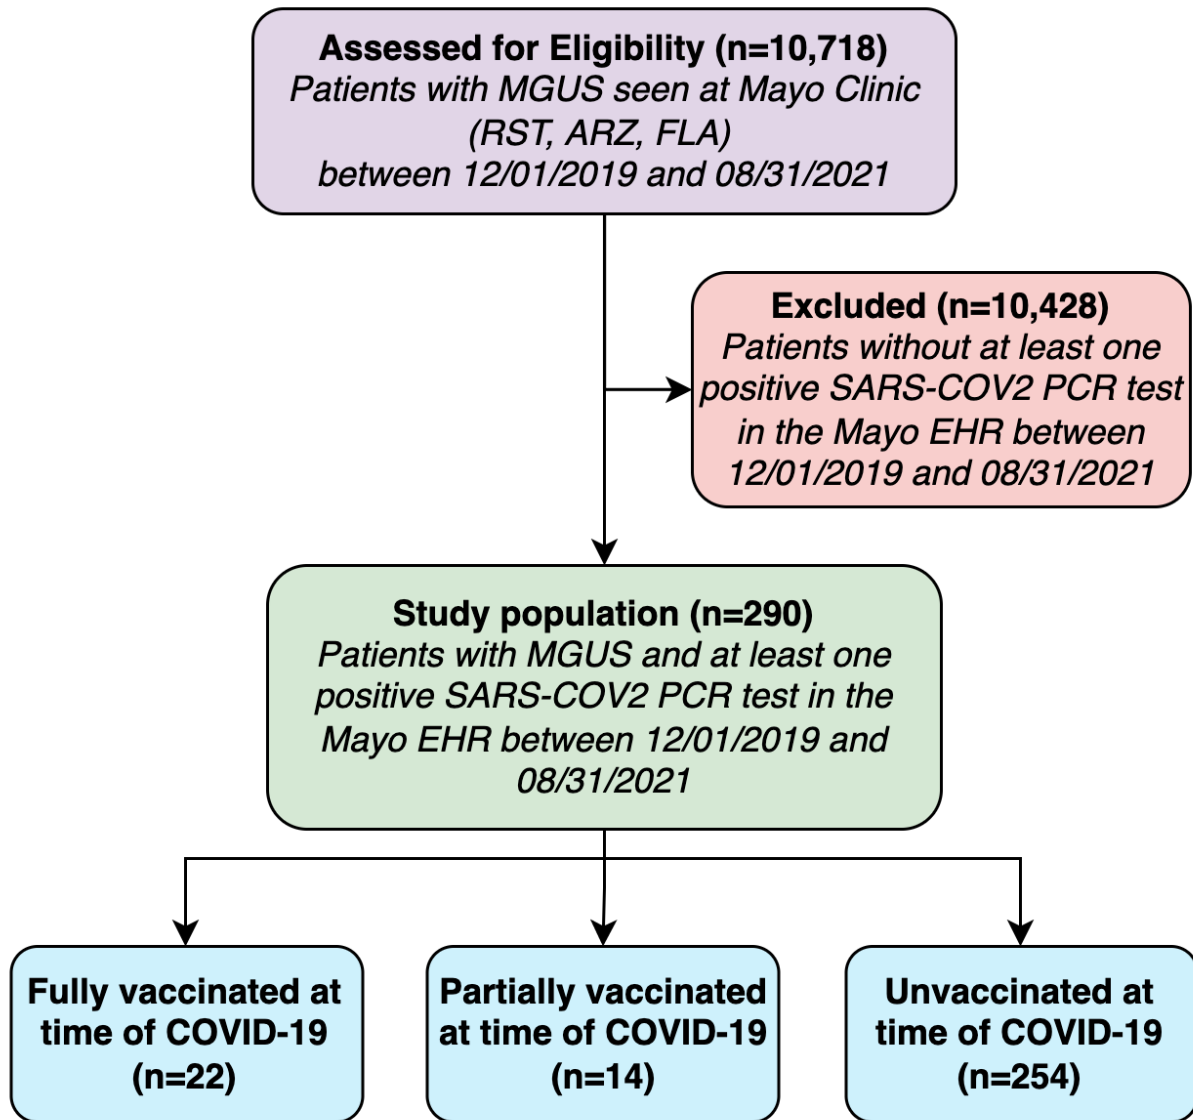

**Supplementary Figure 1: Study design**

The Mayo Clinic (Rochester, Arizona, and Florida) electronic health record was screened and 10,428 consecutive patients with monoclonal gammopathy of undetermined significance (MGUS) who were seen between 12/01/2019 and 08/31/2021 were identified. From this initial cohort, we identified 290 MGUS patients who also had at least one positive SARS-COV2 PCR test between 12/01/2019 and 08/31/2021 to be included in subsequent analyses.

ARZ: Phoenix, Arizona; EHR: electronic health record; FLA: Jacksonville, Florida; MGUS: monoclonal gammopathy of undetermined significance; PCR: polymerase chain reaction; RST: Rochester, Minnesota; SARS-COV2: severe acute respiratory syndrome coronavirus 2

Supplementary Figure 2

(a) Number of COVID-19 infections per day

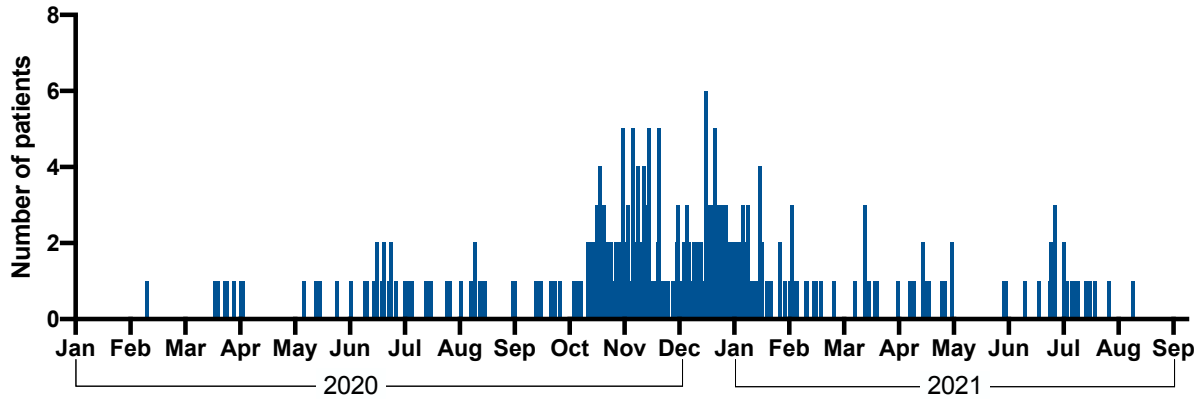

(b) Daily Trends in Number of COVID-19 Cases in the United States Reported to CDC

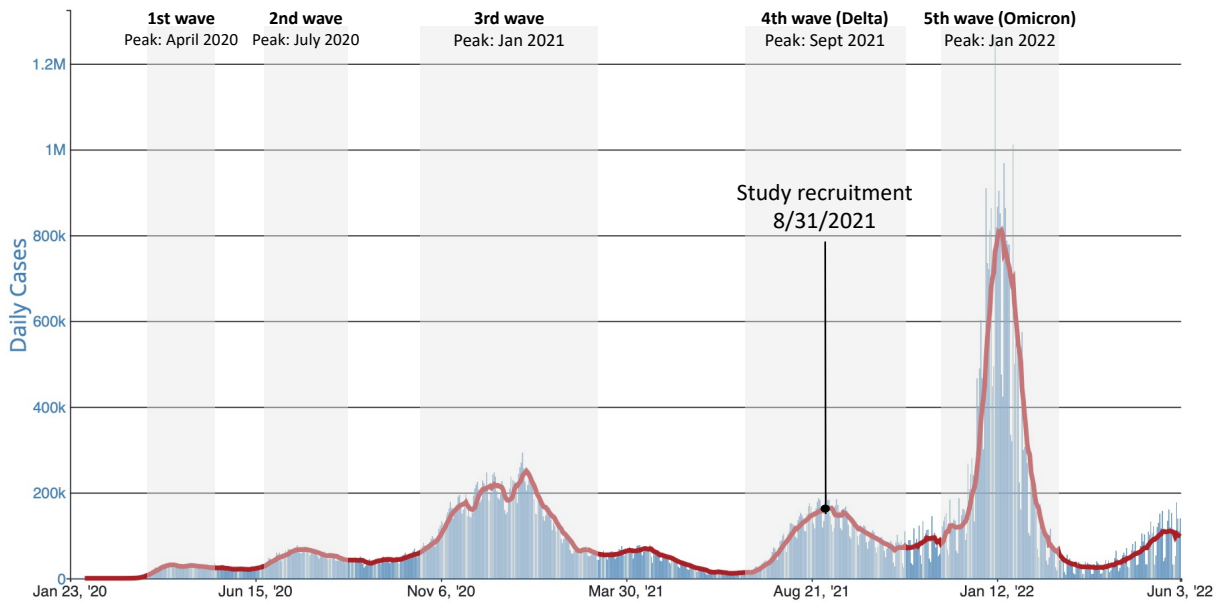

15  
16  
17  
18  
19  
20  
21  
22  
23  
24

**Supplementary Figure 2: Daily trends in number of COVID-19 cases**

(a) Number of COVID-19 infections per day in patients with monoclonal gammopathy of undetermined significance in our study. One-hundred-ninety-seven (70%) of patients in our study developed COVID-19 between 10/1/2020 to 03/1/2021. (b) Daily trends in the number of COVID-19 cases in the United States (*Graph obtained from the CDC's COVID-19 data tracker website*).

Supplementary Figure 3

Univariable analysis of factors associated with severe COVID-19 infection

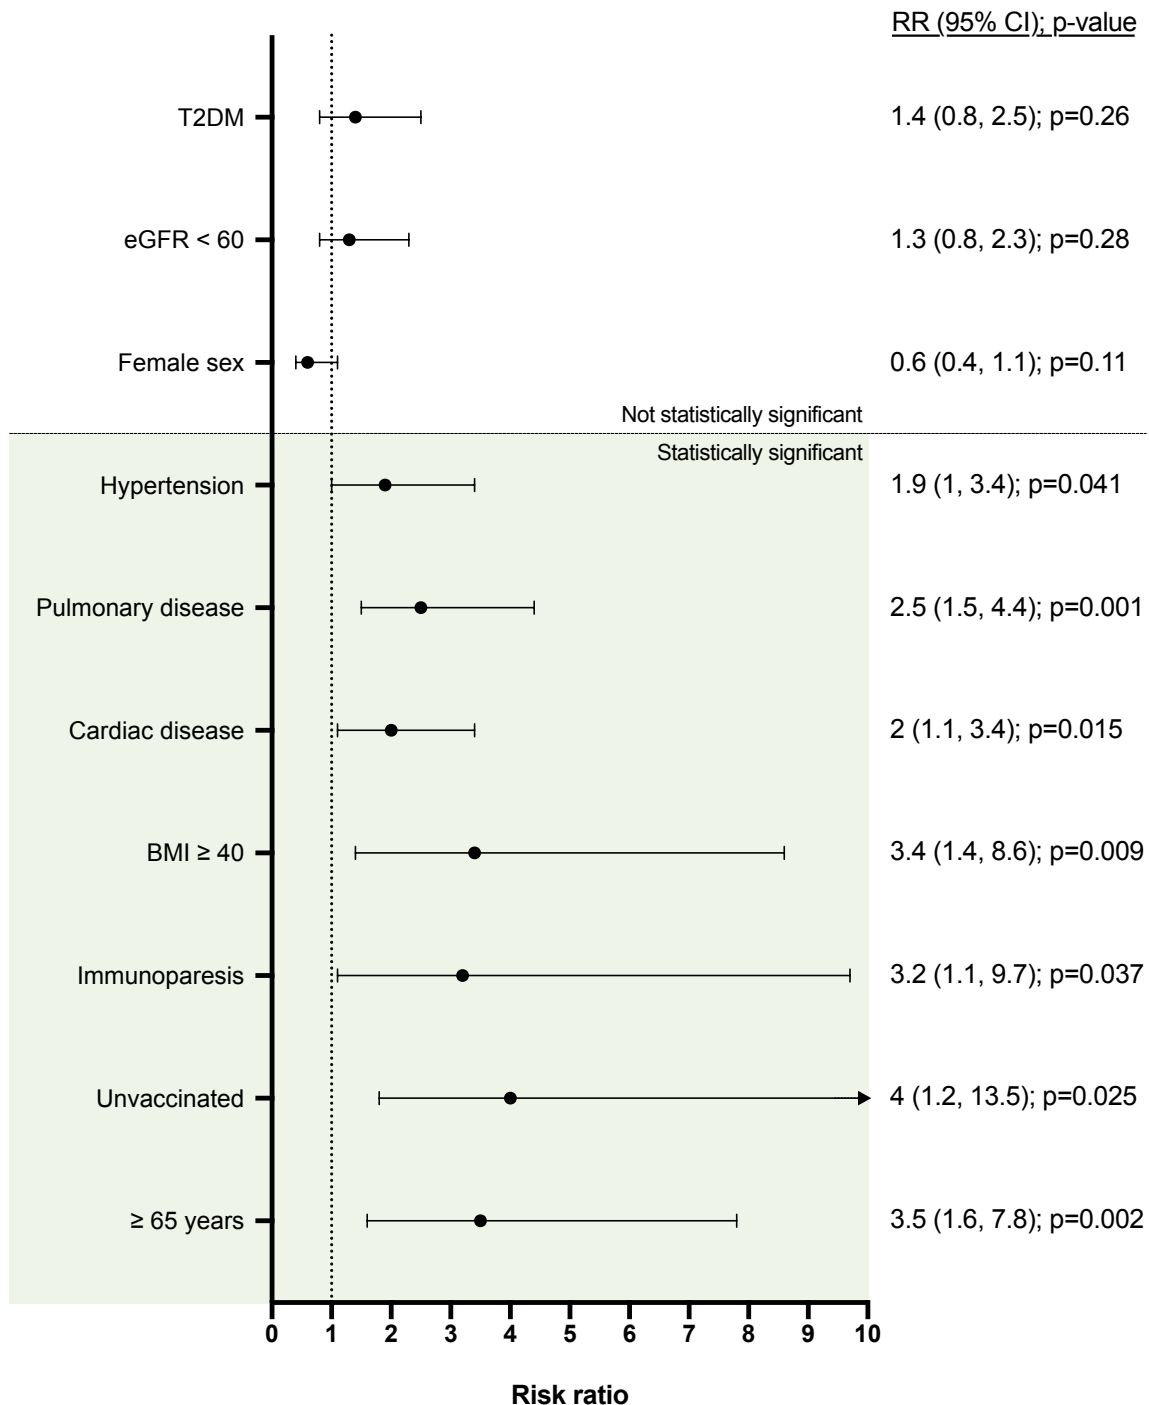

25  
26  
27  
28  
29  
30

**Supplementary Figure 3: Risk ratios (RR) for severe COVID-19 infection**

Univariate logistic regression was used to estimate risk ratios with 95% confidence intervals (CI) for these risk factors associated with severe COVID-19 infection in patients with monoclonal gammopathy of undetermined significance.

*BMI: body mass index; T2DM: type 2 diabetes mellitus*

**Supplementary Figure 4**

**Univariable analysis of factors associated with mortality after COVID-19**

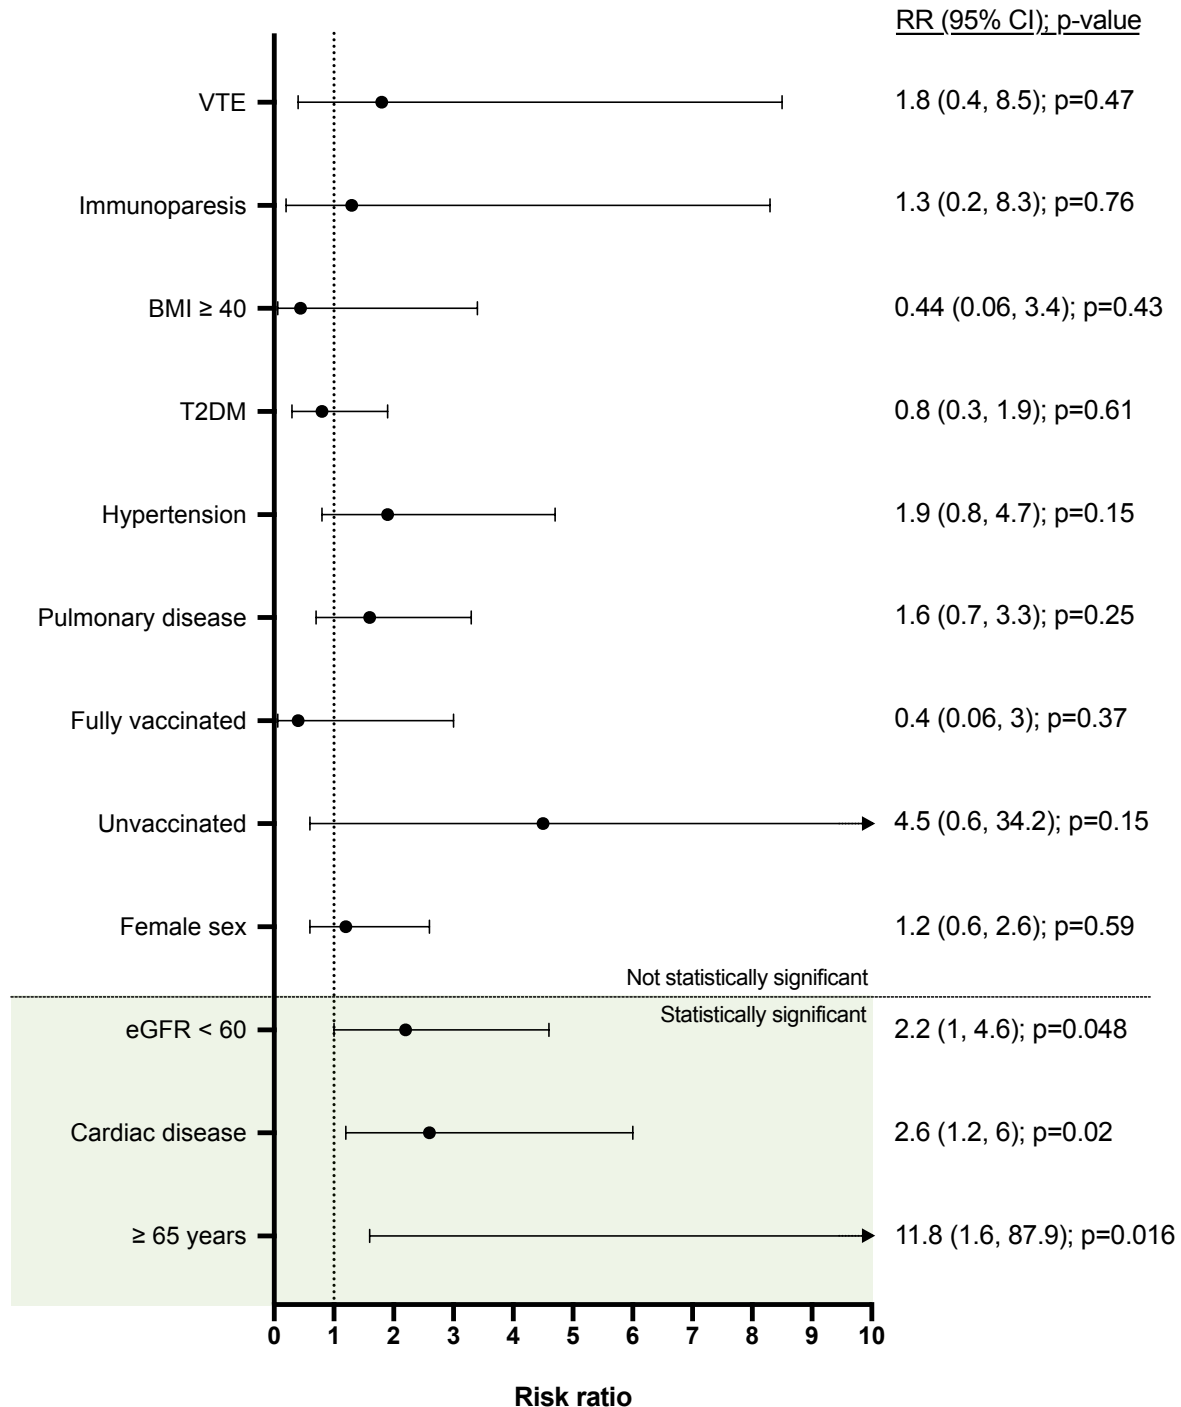

31 **Supplementary Figure 4: Risk ratios (RR) of mortality after COVID-19**  
 32 Univariate logistic regression was used to estimate risk ratios with 95% confidence  
 33 intervals (CI) for these risk factors associated with all-cause mortality following COVID-  
 34 19 infection in patients with monoclonal gammopathy of undetermined significance.  
 35 *BMI: body mass index; T2DM: type 2 diabetes mellitus*  
 36

**Supplementary Table 1: COVID-19 Vaccination Status**

|                                                    | N (%)     |
|----------------------------------------------------|-----------|
| COVID vaccine status at time of COVID-19 infection |           |
| Unvaccinated                                       | 254 (88%) |
| Partially vaccinated                               | 14 (5%)   |
| Pfizer (1 dose)                                    | 6 (2%)    |
| Moderna (1 dose)                                   | 8 (3%)    |
| Fully vaccinated                                   | 22 (8%)   |
| Pfizer (at least 2 doses)                          | 15 (5%)   |
| Moderna (at least 2 doses)                         | 5 (2%)    |
| J&J (at least 1 dose)                              | 1 (0.3%)  |
| Pfizer, Moderna                                    | 1 (0.3%)  |
| COVID-19 vaccine status at time of follow-up       |           |
| Unvaccinated                                       | 89 (31%)  |
| 1 dose of vaccine                                  | 23 (8%)   |
| Pfizer                                             | 7 (2%)    |
| Moderna                                            | 6 (2%)    |
| J&J                                                | 10 (3%)   |
| 2 doses of vaccine                                 | 50 (17%)  |
| Pfizer                                             | 25 (9%)   |
| Moderna                                            | 21 (7%)   |
| J&J                                                | 3 (1%)    |
| J&J, Moderna                                       | 1 (0.3%)  |
| 3 doses of vaccine                                 | 113 (39%) |
| Pfizer                                             | 77 (27%)  |
| Moderna                                            | 35 (12%)  |
| Pfizer, Moderna                                    | 1 (0.3%)  |
| 4 doses of vaccine                                 | 15 (5%)   |
| Pfizer                                             | 10 (3%)   |
| Moderna                                            | 5 (2%)    |
